# Supplementary material for: Single-Island Endemism despite Repeated Dispersal in Caribbean Micrathena (Araneae: Araneidae): An Updated Phylogeographic Analysis
Source: MDPI journal article supplement (doi:10.3390/d14020128), 2022-02-10
Supplement: s1 [file s1]

***Micrathena*** species included in study (with author and year of description)

*Micrathena annulata* Reimoser, 1917  
*Micrathena aureola* (C.L. Koch, 1836)  
*Micrathena banksi* Levi, 1985  
*Micrathena beta* Caporiacco, 1947  
*Micrathena bimucronata* (O. Pickard-Cambridge, 1899)  
*Micrathena brevipes* (O. Pickard-Cambridge, 1890)  
*Micrathena cornuta* (Taczanowski, 1873)  
*Micrathena cubana* (Banks, 1909)  
*Micrathena digitata* (C.L. Koch, 1839)  
*Micrathena duodecimspinos*a (O. Pickard-Cambridge, 1890)  
*Micrathena embira* Levi, 1985  
*Micrathena exlinae* Levi, 1985  
*Micrathena forcipata* (Thorell, 1859)  
*Micrathena gracilis* (Walckenaer, 1805)  
*Micrathena horrida* (Taczanowski, 1873)  
*Micrathena lucasi* (Keyserling, 1864)  
*Micrathena macfarlanei* Chickering, 1961  
*Micrathena militaris* (Fabricius, 1775)  
*Micrathena mitrata* (Hentz, 1850)  
*Micrathena nigrichelis* Strand, 1908  
*Micrathena perfida* Magalhaes, Martins, Nogueira & Santos, 2017  
*Micrathena plana* (C.L. Koch, 1836)  
*Micrathena reimoseri* Mello-Leitão, 1935  
*Micrathena saccata* (C.L. Koch, 1836)  
*Micrathena sagittata* (Walckenaer, 1841)  
*Micrathena schreibersi* (Perty, 1833)  
*Micrathena sexspinos*a (Hahn, 1822)  
*Micrathena similis* Bryant, 1945  
*Micrathena spinulata* F.O. Pickard-Cambridge, 1904  
*Micrathena triangularispinos*a (De Geer, 1778)  
*Micrathena yanomami* Magalhaes & Santos, 2011
